# Supplementary material for: SolvBERT for solvation free energy and solubility prediction: a demonstration of an NLP model for predicting the properties of molecular complexes
Source: Royal Society of Chemistry journal article supplement (doi:10.1039/d2dd00107a), 2023-01-01
Supplement: d2dd00107a1.pdf [file d2dd00107a1.pdf]

# **SolvBERT for solvation free energy and solubility prediction: a demonstration of an NLP model for predicting the properties of molecular complexes**

Jiahui Yu<sup>1</sup>, Chengwei Zhang<sup>2</sup>, Yingying Cheng<sup>2</sup>, Yun-Fang Yang<sup>2</sup>, Yuan-Bin She<sup>2</sup>,  
Fengfan Liu<sup>1</sup>, Weike Su<sup>1</sup>, An Su\*<sup>2</sup>

1. National Engineering Research Center for Process Development of Active Pharmaceutical Ingredients, Collaborative Innovation Center of Yangtze River Delta Region Green Pharmaceuticals, Zhejiang University of Technology, Hangzhou, 310014, P. R. China
2. College of Chemical Engineering, Zhejiang University of Technology, Hangzhou 310014, P. R. China

## **Corresponding author:**

Prof. An Su

College of Chemical Engineering, Zhejiang University of Technology, Hangzhou  
310014, P. R. China

Email: [ansu@zjut.edu.cn](mailto:ansu@zjut.edu.cn)

## **Supporting Information**

### **1. Methods for measuring the solubility of out-of-sample solute-solvent combinations**

The static gravimetric method was used to determine the solubility of solutes in pure solvents<sup>1</sup>. The detailed processes of the experiments are listed as follows:

- (1) The mass of the solute is weighed on an analytical balance at about 1g.
- (2) Use SolvBERT to predict the mass of solvent needed and calculate the approximate amount needed
- (3) Add the solvent slowly, stirring while adding, and let stand to ensure that there are no obvious fine particles in the supernatant.
- (4) Take about 2ml of the supernatant and transfer it to a Petri dish using a syringe with an organic membrane filter (to remove fine particles that cannot be separated by precipitation)
- (5) Petri dishes containing the saturated solution were quickly weighed and then placed in a desiccator at 333.15 K for approximately 24 hours to evaporate all solvents.
- (6) Remove the residual solid from the Petri dish after evaporation and weigh after cooling to room temperature. Remove from the desiccator, cool to room temperature and weigh. Weigh the process until the Petri dish with residual solids has no significant weight loss.

**Table S1.** Materials for measuring the solubility of out-of-sample solute-solvent combinations

| Chemical name                         | Molecular formula                                           | Molecular Weight(g/mol) | Mass fraction purity(%) | CAS registry number | Source                                                      |
|---------------------------------------|-------------------------------------------------------------|-------------------------|-------------------------|---------------------|-------------------------------------------------------------|
| O-methyl-N-nitrosoourea               | C <sub>2</sub> H <sub>5</sub> N <sub>3</sub> O <sub>3</sub> | 119.08                  | 98                      | 57538-27-9          | Qingdao Dexin Chemical Co., Ltd.                            |
|                                       |                                                             |                         |                         |                     |                                                             |
| 3-Methyl-2-nitrobenzoic acid          | C <sub>8</sub> H <sub>7</sub> NO <sub>4</sub>               | 181.15                  | 98                      | 5437-38-7           | Sahn Chemical Technology (Shanghai) Co., Ltd.               |
|                                       |                                                             |                         |                         |                     |                                                             |
| 2-Amino-5-chloro-3-methylbenzoic acid | C <sub>8</sub> H <sub>8</sub> ClNO <sub>2</sub>             | 185.61                  | 97                      | 20776-67-4          | Accela ChemBio Co., Ltd.                                    |
|                                       |                                                             |                         |                         |                     |                                                             |
| 1,4-naphthoquinone                    | C <sub>10</sub> H <sub>6</sub> O <sub>2</sub>               | 158.15                  | 97                      | 130-15-4            | Anhui Zesheng Technology Co., Ltd.                          |
|                                       |                                                             |                         |                         |                     |                                                             |
| Anthracene                            | C <sub>14</sub> H <sub>10</sub>                             | 178.23                  | 98                      | 120-12-7            | Copyright Shanghai Aladdin Biochemical Technology Co., Ltd. |
|                                       |                                                             |                         |                         |                     |                                                             |
| 4-Chlorophthalic anhydride            | C <sub>8</sub> H <sub>3</sub> ClO <sub>3</sub>              | 182.56                  | 98                      | 118-45-6            | Shanghai Eon Chemical Technology Co., Ltd.                  |
|                                       |                                                             |                         |                         |                     |                                                             |
| Acetone                               | C <sub>3</sub> H <sub>8</sub> O                             | 58.08                   | 99.5                    | 67-64-1             | Shanghai Maclean Biochemical Technology Co., Ltd.           |
|                                       |                                                             |                         |                         |                     |                                                             |
| Ethanol                               | C <sub>2</sub> H <sub>6</sub> O                             | 46.07                   | 99.5                    | 64-17-5             | Shanghai Maclean Biochemical Technology Co., Ltd.           |
|                                       |                                                             |                         |                         |                     |                                                             |
| Methanol                              | CH <sub>4</sub> O                                           | 32.04                   | 99.5                    | 67-56-1             | Shanghai Lingfeng Chemical Reagent Co., Ltd.                |
|                                       |                                                             |                         |                         |                     |                                                             |
| Ethyl acetate                         | C <sub>4</sub> H <sub>8</sub> O <sub>2</sub>                | 88.11                   | 99.5                    | 141-78-6            | Shanghai Maclean Biochemical Technology Co., Ltd.           |
|                                       |                                                             |                         |                         |                     |                                                             |
| 1-Propanol                            | C <sub>3</sub> H <sub>8</sub> O                             | 60.1                    | 99.5                    | 71-23-8             | Hangzhou Bongyi Chemical Co., Ltd.                          |
|                                       |                                                             |                         |                         |                     |                                                             |
| Dichloromethane                       | CH <sub>2</sub> Cl <sub>2</sub>                             | 84.93                   | 99.5                    | 75-09-2             | Shanghai Maclean Biochemical Technology Co., Ltd.           |
|                                       |                                                             |                         |                         |                     |                                                             |

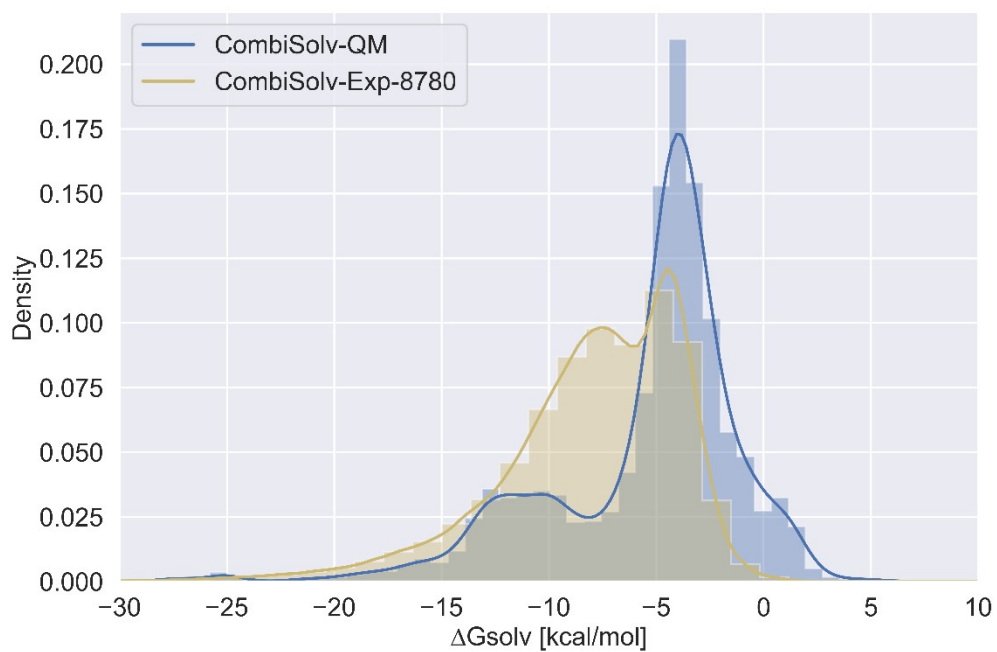

**Figure S1.** The distribution of  $\Delta G_{solv}$  for the CombiSolv-QM and CombiSolv-Exp-8780 databases.

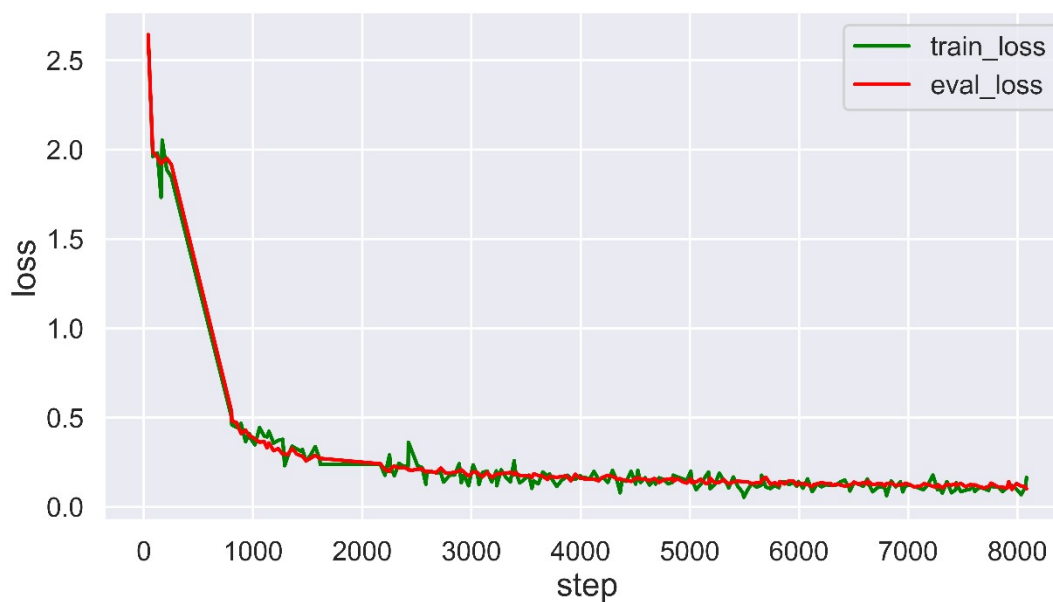

**Figure S2.** The learning curves for the training of SolvBERT model

**Table S2.** Hyperparameter optimization for SolvBERT

| number | learning_rate | hidden_dropout_rate | R2    | RMSE | MAE  |
|--------|---------------|---------------------|-------|------|------|
| 1      | 0.0004        | 0.1                 | 0.966 | 0.78 | 0.50 |
| 2      | 0.0005        | 0.4                 | 0.951 | 0.94 | 0.55 |
| 3      | 0.00009       | 0.1                 | 0.97  | 0.77 | 0.46 |
| 5      | 0.0001        | 0.2                 | 0.97  | 0.77 | 0.46 |
| 6      | 0.00007       | 0.1                 | 0.978 | 0.79 | 0.48 |
| 7      | 0.0001        | 0.1                 | 0.949 | 1.00 | 0.61 |
| 8      | 0.00008       | 0.2                 | 0.974 | 0.71 | 0.49 |
| 9      | 0.00002       | 0.4                 | 0.974 | 0.71 | 0.49 |
| 10     | 0.00008       | 0.4                 | 0.981 | 0.60 | 0.37 |

**Table S3.** Hyperparameter optimization for GCN

| number | dropout | lr      | r2   |
|--------|---------|---------|------|
| 1      | 0.2     | 0.002   | 0.84 |
| 2      | 0.8     | 0.0018  | 0.59 |
| 3      | 0.3     | 0.0007  | 0.74 |
| 4      | 0.3     | 0.002   | 0.87 |
| 5      | 0.3     | 0.0002  | 0.76 |
| 6      | 0.4     | 0.00002 | 0.52 |
| 7      | 0.2     | 0.0016  | 0.84 |
| 8      | 0.1     | 0.0004  | 0.80 |
| 9      | 0.2     | 0.004   | 0.89 |
| 10     | 0.1     | 0.004   | 0.92 |

## References

1. Huang, H.; Qiu, J.; He, H.; Guo, Y.; Liu, H.; Hu, S.; Han, J.; Zhao, Y.; Wang, P., Solubility Behavior and Polymorphism of N-Acetyl-dl-methionine in 16 Individual Solvents from 283.15 to 323.15 K. *Journal of Chemical & Engineering Data* **2021**, *66* (5), 2182-2191.
